# Supplementary material for: Cytolytic activity correlates with the mutational burden and deregulated expression of immune checkpoints in colorectal cancer
Source: J Exp Clin Cancer Res. 2019 Aug 20;38:364. doi: 10.1186/s13046-019-1372-z (PMC6701076; doi:10.1186/s13046-019-1372-z)
Supplement: Supplementary file 19 — Table S10. CIBERSORT analysis results depict the fractional representations of 22 hematopoietic cell types present in the gene expression profile of each cytolytic subset in colon (COAD) and rectal (READ) cancers, respectively. Columns represent cell types from the signature genes file and rows represent deconvolution results for each tumor sample in each cytolytic subgroup. Filtering was set at p = 0.05 with 1000 permutations during analysis. All results are reported as relative fractions normalized to 1 across all cell subsets. P-value: Statistical significance of the deconvolution result across all cell subsets; useful for filtering out results with a poor “goodness of fit”. Correlation: Pearson’s correlation coefficient (R), generated from comparing the original mixture with the estimated mixture, the latter of which is calculated using imputed cell fractions and corresponding expression profiles from the signature genes file. Of note, the correlation is restricted to signature genes. RMSE: Root mean squared error between the original mixture and the imputed mixture, restricted to genes in the signature gene file. (XLSX 10 kb) [file 13046_2019_1372_MOESM19_ESM.xlsx]

## Sheet: qPCR primers
Gene	Forward (5'-3')	Reverse (5'-3')	Amplicon Size (bp)
GZMA	TCTCTCTCAGTTGTCGTTTCTCT	GCAGTCAACACCCAGTCTTTTG	248
PRF1	GGCTGGACGTGACTCCTAAG	CTGGGTGGAGGCGTTGAAG	233
CD274 (PD-L1)	TATGGTGGTGCCGACTACAA	TGGCTCCCAGAATTACCAAG	180
PDCD1LG2 (PD-L2)	GTCTTGGGAGCCAGGGTGA	TGAAAAGTGCAAATGGCAAGC	120
CD8	ACTTGTGGGGTCCTTCTCCT	GTCTCCCGATTTGACCACAG	125
FOXP3	GTGGCCCGGATGTGAGAAG	GGAGCCCTTGTCGGATGATG	238
MLH1	CTCTTCATCAACCATCGTCTGG	GCAAATAGGCTGCATACACTGTT	76
MSH2	AGGCATCCAAGGAGAATGATTG	GGAATCCACATACCCAACTCCAA	176
MSH6	CCAAGGCGAAGAACCTCAAC	ACCAGGGGTAACCCTCCATC	117
PMS2	CCTATTGATCGGAAGTCAGTCCA	CTACTAACTCCTTTACCGCAGTG	82
IDO1	GCCAGCTTCGAGAAAGAGTTG	ATCCCAGAACTAGACGTGCAA	96
LAG3	GCGGGGACTTCTCGCTATG	GGCTCTGAGAGATCCTGGGG	158
ACTB	CTGGAACGGTGAAGGTGACA	AAGGGACTTCCTGTAACAATGCA	101
GAPDH	GGAGCGAGATCCCTCCAAAAT	GGCTGTTGTCATACTTCTCATGG	197
B2M	GAGGCTATCCAGCGTACTCCA	CGGCAGGCATACTCATCTTTT	248
